# Supplementary material for: Therapeutic effect of fecal microbiota transplantation on hyperuricemia mice by improving gut microbiota
Source: Frontiers journal article supplement (doi:10.3389/fmicb.2025.1599107), 2025-08-05
Supplement: Data_Sheet_1.pdf [file Data_Sheet_1.pdf]

# Gut Microbiota Analysis of Donor 1101

At the phylum level, the gut microbiota is dominated by Firmicutes and Bacteroidota. At the genus level, *Bacteroides*, *Faecalibacterium*, *Prevotella*, and *Lachnospira* are predominant. After FMT, the abundance of *Prevotellaceae\_UCG-001* and *Lachnospiraceae\_NK4A136* in mice is higher than in the model group, possibly due to the donor's higher abundance of *Prevotella* and *Lachnospira*.

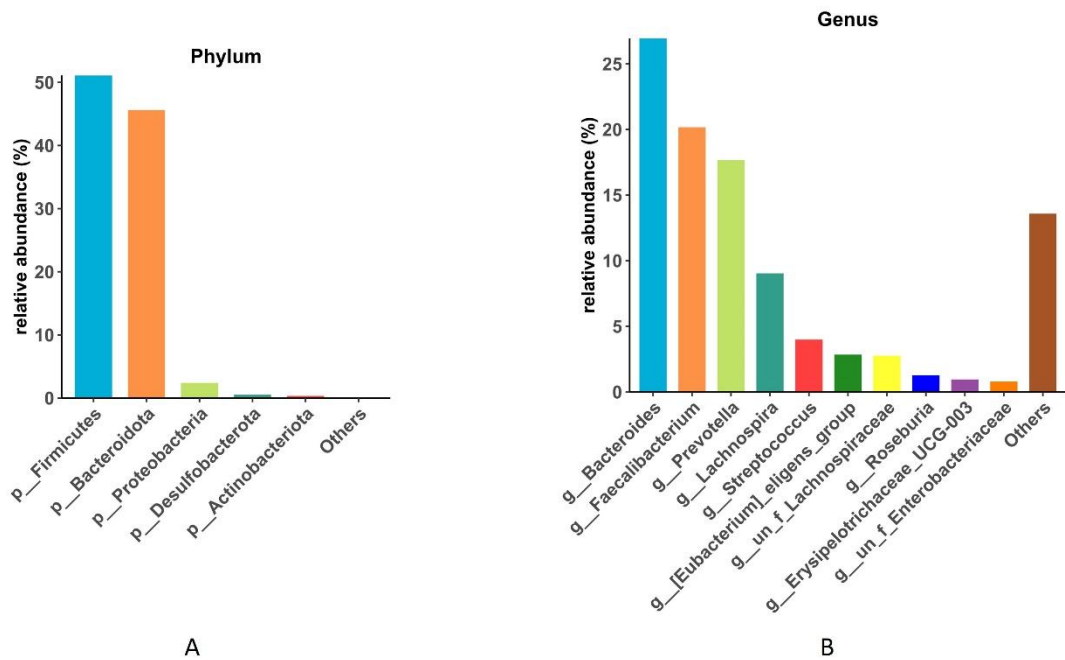

(A) The phylum level. (B) The genus level.
